# Supplementary material
Source: publisher site journal article supplement (http://scielo.br/pdf/rbef/v46s1/1806-9126-rbef-46-suppl1-e20240187.pdf)
Supplement: Supplementary file 1 [file 1806-9126-rbef-46-suppl1-e20240187.pdf]

# Nanopartículas Magnéticas à Base de Óxido de Ferro: Propriedades Magnéticas e Aplicações na Medicina

Iron Oxide-Based Magnetic Nanoparticles: Magnetic Properties and applications in Medicine

Marcus Vinícius-Araújo<sup>1</sup>, João Victor Ribeiro Rocha<sup>1</sup>, Andris F. Bakuzis\*<sup>1</sup>

<sup>1</sup>Universidade Federal de Goiás, Goiânia, GO, Brasil.

Recebido em 27 de maio de 2024. Aceito em 30 de maio de 2024.

As nanopartículas (NPs) à base de óxido de ferro, como magnetita e maguemita, têm grande destaque em diversas áreas da ciência, inclusive na medicina. Há décadas, elas são usadas na reposição de ferro para pacientes com anemia, como agentes de contraste em ressonância magnética (MRI – “Magnetic Resonance Imaging”), na entrega de agentes terapêuticos mediada ou não por gradiente de campo magnético, em terapias térmicas foto e magnetoestimuladas, entre outras. Neste artigo, apresentamos suas propriedades magnéticas. Discutimos de forma breve seu ordenamento ferrimagnético, a importância da anisotropia magnética e sua relação com a histerese magnética (modelo de Stoner-Wohlfarth) e o regime superparamagnético. As diferenças entre superparamagnetismo e paramagnetismo são enfatizadas, além da importância da estabilidade coloidal dessas nanoestruturas para aplicações biomédicas. Finalmente, diversas aplicações biomédicas são discutidas, entre elas hipertermia magnética, terapia fototérmica, imunoterapia e uma nova técnica de imagem com potencial clínico, conhecida como “Magnetic Particle Imaging” (MPI).

**Palavras-chave:** Nanopartículas, Nanopartículas Magnéticas, Superparamagnetismo, Nanomedicina, SPION.

Iron oxide-based nanoparticles (NPs), such as magnetite and maghemite, are highly prominent in various scientific fields, including medicine. For decades, they have been used for iron supplementation in patients with anemia, as contrast agents in magnetic resonance imaging (MRI), in the delivery of therapeutic agents mediated or not by magnetic field gradients, and in photo- and magneto-stimulated thermal therapies, among other applications. In this article, we present their magnetic properties. We briefly discuss their ferrimagnetic ordering, the importance of magnetic anisotropy and its relation to magnetic hysteresis (Stoner-Wohlfarth model), and the superparamagnetic regime. The differences between superparamagnetism and paramagnetism are emphasized, as well as the importance of the colloidal stability of these nanostructures for biomedical applications. Finally, various biomedical applications are discussed, including magnetic hyperthermia, photothermal therapy, immunotherapy, and a new imaging technique with clinical potential known as Magnetic Particle Imaging (MPI).

**Keywords:** Nanoparticles, Magnetic Nanoparticles, Superparamagnetism, Nanomedicine, SPION.

## 1. Introdução

Nanopartículas (NPs) são pequenas partículas com tamanhos medidos em nanômetros (nm), sendo que 1 nm é igual a 1 bilionésimo de metro (1 nm =  $10^{-9}$  metros) [1]. Na nanotecnologia, essas partículas são classificadas pelo seu tamanho em três categorias: ultrafinas (1 a 100 nm), finas (100 a 2500 nm) e espessas (2500 a 10000 nm). Nos últimos anos, a pesquisa sobre esses nanocristais tem crescido muito por causa de suas diversas aplicações nas áreas de energia, meio ambiente, e saúde [1, 2].

O desenvolvimento e a aplicação da nanotecnologia na saúde criaram o campo da Nanomedicina, que promete revolucionar o monitoramento, prevenção, diagnóstico e tratamento de doenças. Para fabricar essas nanoestruturas inteligentes, é essencial controlar sua composição, tamanho, forma, carga e superfície. Além disso, essas nanoestruturas podem combinar várias funções em um

único sistema estável, aumentando sua eficácia. Por isso, muitos tipos de NPs estão sendo estudados para uso na nanomedicina, incluindo NPs de ouro [3], prata [4], pontos quânticos [5], sílica mesoporosa [6], carbono [7], magnéticas [8] e fluoreto [9].

As NPs magnéticas, que são de nosso maior interesse, são feitas principalmente de magnetita ( $\text{Fe}_3\text{O}_4$ ), maghemita ( $\gamma\text{-Fe}_2\text{O}_3$ ) e óxidos de ferro dopados com outros metais ( $\text{MFe}_2\text{O}_4$ , onde  $\text{M}^{2+}$  são íons como Mn, Fe, Zn, Co, etc.). Esses óxidos de ferro, em geral, são chamados de ferritas. Muitos esforços têm sido feitos para melhorar suas propriedades magnéticas. Diversos métodos úmidos (ou seja, realizados em solução aquosa) foram desenvolvidos para criar essas NPs, como o método sol-gel, síntese hidrotérmica/solvotérmica, método Pechini, secagem por spray e pirólise por spray de aerossol [10]. Esses métodos, em comparação com a síntese em estado sólido, geralmente resultam em partículas menores, necessitam de temperaturas mais baixas e levam menos tempo para formar as partículas.

\*Endereço de correspondência: bakuzis@ufg.br

Os métodos úmidos mais comuns para criar NPs de óxido de ferro incluem coprecipitação, decomposição térmica, síntese em polióis e síntese hidrosolvotérmica. Além disso, essas NPs podem ser funcionalizadas na superfície com surfactantes, polímeros, proteínas, anticorpos, peptídeos, moléculas fluorescentes no infravermelho próximo (“NIR”), sílica, etc., para melhorar sua estabilidade e funcionalidade [11]. Devido a essas características, as NPs de óxido de ferro são amplamente usadas em separação e marcação celular, terapias térmicas, entrega de agentes terapêuticos e agentes de contraste em imagem por ressonância magnética, entre outras.

As Ferritas são óxidos de ferro. Em muitos casos possuem um ordenamento ferrimagnético, como discutido abaixo. Quanto a sua estrutura cristalina, existem dois tipos principais: cúbica, com fórmula geral  $MO \cdot Fe_2O_3$ , onde M é um íon metálico divalente como Mn, Ni, Fe, Co ou Mg; e hexagonal, como a ferrita de bário ( $BaO \cdot 6Fe_2O_3$ ) e a ferrita de estrôncio ( $SrO \cdot 6Fe_2O_3$ ) [12].

Ferritas cúbicas têm uma estrutura cristalina chamada espinélio, com fórmula geral  $(A)[B]_2O_4$ . A célula unitária dessa estrutura contém 8 dessas moléculas na sua composição, totalizando 56 íons por célula unitária. A rede cristalina é cúbica de face centrada (CFC) e possui dois tipos de sítios. O sítio tetraédrico (A) tem o cátion no centro de um tetraedro formado por íons de oxigênio, e o sítio octaédrico [B] tem o cátion cercado por íons de oxigênio formando um octaedro [12]. Dependendo de como os cátions estão distribuídos nesses sítios, a estrutura espinélio pode ser normal ( $X^{2+}[Y^{3+}Y^{3+}]O_4$ , com cátions  $X^{2+}$  nos sítios tetraédricos e cátions  $Y^{3+}$  nos sítios octaédricos, ou inversa ( $Y^{3+}[X^{2+}Y^{3+}]O_4$ , com cátions  $Y^{3+}$  nos sítios tetraédricos e uma mistura de cátions  $X^{2+}$  e  $Y^{3+}$  nos sítios octaédricos. Em alguns casos, os cátions divalentes podem ocupar ambos os tipos de sítios, criando uma estrutura de espinélio misto.

Na próxima seção, discutiremos as propriedades magnéticas dessas NPs à base de óxido de ferro, também conhecidas como SPIONs, do termo em inglês “Superparamagnetic Iron Oxide Nanoparticles”. Em seguida, exploraremos suas aplicações mais relevantes na medicina.

## 2. Fundamentação Teórica

### 2.1. Nanomagnetismo

Todos os materiais reagem de alguma forma à aplicação de um campo magnético. Quando esse campo é aplicado, os pequenos dipolos, modelados de forma simplificada por correntes elétricas resultantes do movimento dos elétrons, se alinham, levando o meio a se tornar magneticamente polarizado, ou seja, magnetizado. Ao contrário da polarização elétrica, onde a orientação segue quase sempre a direção do campo elétrico ( $\mathbf{E}$ ), no caso magnético, diferentes materiais respondem de maneiras distintas ao campo externo. De forma simplificada, em

um circuito eletrônico em forma de espiral com uma área  $A$  e intensidade de corrente  $I$ , o momento magnético é representado pela equação  $\mu = IA$ . Essa expressão é facilmente relacionada com o momento angular orbital para o caso de um circuito. O momento magnético por unidade de volume é denominado magnetização. Em baixa amplitude de campo magnético, a magnetização é proporcional ao campo aplicado e é expressa pela relação  $\mathbf{M} = \chi \mathbf{H}$ . Aqui,  $\chi$  é a susceptibilidade magnética, uma medida adimensional da resposta magnética do material, que de maneira geral pode ser representada por  $\chi = \partial M / \partial H$ . Essa resposta pode ser tanto positiva quanto negativa, indicando o tipo de comportamento magnético do material. Materiais paramagnéticos adquirem uma magnetização paralela ao campo magnético ( $\mathbf{B} = \mu_0 \mathbf{H}$ , onde  $\mu_0$  é a permeabilidade magnética no vácuo),  $\chi > 0$ , enquanto materiais diamagnéticos adquirem uma magnetização oposta ao campo  $\mathbf{B}$ ,  $\chi < 0$ . Já os materiais ferromagnéticos possuem uma susceptibilidade positiva e muito alta, em comparação com o paramagnético.

#### 2.1.1. Paramagnetismo

No paramagnetismo, os momentos atômicos se alinham no sentido do campo magnético aplicado. No entanto, como mencionado anteriormente, na ausência desse campo, esse alinhamento deixa de existir, o que significa que não há ordenamento magnético a campo nulo. Como o momento magnético é proporcional ao momento angular total (soma das contribuições orbital e de spin), a projeção na direção do campo é expressa por  $\mu_J^z = g \mu_B M_J$ , onde  $M_J$  pode assumir os seguintes valores:  $J, J - 1, \dots, -(J - 1), -J$ , sendo  $J$  o número quântico do momento angular total,  $\mu_B$  o magneton de Bohr e  $g$  o chamado fator de Landé. Com  $g = 1 + \frac{J(J+1) + S(S+1) - L(L-1)}{2J(J+1)}$ , e  $S$  e  $L$  sendo, respectivamente, o momento angular de spin e o momento angular orbital. O momento magnético interage com o campo magnético por meio do termo Zeeman. Logo, considerando todos os estados quânticos possíveis, o momento magnético médio pode ser calculado por:

$$\langle \mu_J^z \rangle_T = \frac{g \mu_B \sum_{M_J} M_J \exp\left(\frac{g \mu_B B M_J}{k_B T}\right)}{\sum_{M_J} \exp\left(\frac{g \mu_B B M_J}{k_B T}\right)}. \quad (1)$$

Essa equação pode ser reescrita em termos da famosa função de Brillouin  $B_J(x)$ , definida como:

$$B_J(x) = \left(1 + \frac{1}{2J}\right) \coth \left[ \left(1 + \frac{1}{2J}\right) x \right] - \frac{1}{2J} \coth \left( \frac{x}{2J} \right), \quad (2)$$

onde  $x = g \mu_B B M_J / k_B T$  e  $k_B$  é a constante de Boltzmann. Dessa forma, o momento magnético pode ser reescrito como  $\langle \mu_J^z \rangle_T = g \mu_B J B_J(x)$ . No limite de campo baixo, ou seja,  $x \ll 1$ , pode-se encontrar a susceptibilidade

inicial, usando a seguinte aproximação para a cotangente hiperbólica:  $\text{cotgh}(x) = 1/x + x/3 + O(x^3)$ . Substituindo os dois primeiros termos da equação na função de Brillouin, equação (2):

$$B_J(x) \approx \left(1 + \frac{1}{2J}\right) \left(\frac{1}{(1 + \frac{1}{2J})x} + \frac{(1 + \frac{1}{2J})}{3}x\right) - \frac{1}{2J} \left(\frac{2J}{x} + \frac{x}{6J}\right) = \frac{J+1}{3J}x. \quad (3)$$

Agora, substituindo na equação do momento magnético e multiplicando por  $n$  (número de partículas por unidade de volume), obtemos

$$M = n\langle\mu_J^z\rangle_T \approx ng\mu_B J \frac{J+1}{3J}x = ng\mu_B J \frac{ng\mu_B JB}{k_B T} \frac{J+1}{3J}. \quad (4)$$

Usando a equação  $\chi = \partial M/\partial H$  e lembrando que  $\mathbf{B} = \mu_0\mathbf{H}$ , a susceptibilidade pode ser escrita como:

$$\chi = \frac{\mu_0 ng^2 \mu_B^2 J(J+1)}{3k_B T} = \frac{C}{T}, \quad C = \frac{\mu_0 ng^2 \mu_B^2 J(J+1)}{3k_B}. \quad (5)$$

Esta é conhecida como a lei de Curie, onde  $C$  é a constante de Curie.

### 2.1.2. Ferromagnetismo e ferrimagnetismo

No ferromagnetismo, os dipolos magnéticos apontam espontaneamente na mesma direção que seus vizinhos próximos, formando o que chamamos de domínios magnéticos. No entanto, se o material for grande (“bulk”), os domínios magnéticos apontam em direções randômicas, resultando em uma magnetização nula do material na ausência de um campo magnético externo. Esse caso é diferente do paramagnético, pois em cada domínio há um ordenamento dos spins para o caso ferromagnético, o que não existe na situação paramagnética.

No início do século XX, por meio de um modelo desenvolvido por Pierre Weiss, foi possível obter uma compreensão mais aprimorada do ferromagnetismo. Weiss propôs a existência de um campo molecular proporcional à magnetização do material. Ele formulou a seguinte expressão para o campo molecular  $\mathbf{B}_m = \lambda\mathbf{M}$ . Essa quantidade  $\lambda$  é conhecida como constante de campo molecular ou coeficiente de campo molecular. Assim, o campo molecular atua sobre os momentos magnéticos atômicos em conjunto com o campo aplicado. Vale ressaltar que Weiss apenas propôs esse campo molecular e não explicou sua origem. Essa origem é conhecida hoje, graças à mecânica quântica, e decorre da interação de troca entre os elétrons dos materiais que exibem esse tipo de comportamento magnético. Esse termo energético é conhecido como interação de Heisenberg.

Anteriormente, foi mencionado que a magnetização pode ser expressa como  $M = n\langle\mu_J^z\rangle_T$ , onde  $n$  é o

número de partículas por unidade de volume do material. Assim, o módulo do campo molecular é  $B_m = \lambda n\langle\mu_J^z\rangle_T$ . Analogamente ao caso do paramagnetismo podemos escrever  $\langle\mu_J^z\rangle_T = g\mu_B JB_J(x')$ . Note que  $x'$  é semelhante a  $x$  no caso paramagnético, porém houve a inclusão do termo de campo molecular somado ao campo aplicado  $\mathbf{B}_{ef} = \mathbf{B}_{ext} + \mathbf{B}_m$ , e pode ser escrito na teoria de campo médio como

$$x' = g\mu_B J \frac{(B_{ext} + \lambda n\langle\mu_J^z\rangle_T)}{k_B T}. \quad (6)$$

Dessa forma,

$$\langle\mu_J^z\rangle_T = g\mu_B JB_J \left( g\mu_B J \frac{(B_{ext} + \lambda n\langle\mu_J^z\rangle_T)}{k_B T} \right). \quad (7)$$

Na ausência de campo externo, neste caso,  $B_{ext} = 0$ , esta expressão pode ser reescrita como:

$$\langle\mu_J^z\rangle_T = g\mu_B JB_J \left( g\mu_B J \frac{\lambda n\langle\mu_J^z\rangle_T}{k_B T} \right). \quad (8)$$

Esta é uma equação transcendental que pode ser resolvida numericamente; e indica a existência de uma temperatura crítica abaixo da qual existe ordenamento magnético. Essa temperatura crítica, chamada temperatura de Curie, é obtida fazendo a aproximação para  $x' \ll 1$  na função de Brillouin  $B_J(x') \approx \frac{J+1}{3J}x'$ . Dessa forma,

$$T_C = \frac{n\lambda g^2 \mu_B^2 J(J+1)}{3k_B}. \quad (9)$$

Da mesma forma para a magnetização, quando a temperatura é a temperatura de Curie ( $T_C$ ), a magnetização tende a zero, então pode-se escrever

$$M = n\langle\mu_J^z\rangle_T = ng\mu_B JB_J(x') \approx ng\mu_B \frac{(J+1)}{3}x'. \quad (10)$$

Substituindo  $x'$  dado pela equação (6), resulta em

$$M \approx \frac{n\lambda g^2 \mu_B^2 J(J+1)(B_{ext} + \lambda n\langle\mu_J^z\rangle_T)}{3k_B T}, \quad (11)$$

ou,

$$M = \frac{C \frac{B}{\mu_0}}{T - \lambda C/\mu_0}, \quad (12)$$

onde  $C$  é a constante de Curie. Assim, a susceptibilidade é dada por:

$$\chi = \frac{C}{T - \lambda C/\mu_0} = \frac{C}{T - \Theta}, \quad (13)$$

onde a temperatura de ordenamento é:

$$\Theta = \frac{\lambda C}{\mu_0} = \frac{n\lambda g^2 \mu_B^2 J(J+1)}{3k_B}. \quad (14)$$

Note que para valores acima de  $\Theta$ , o ordenamento dos momentos magnéticos atômicos deixa de existir e então o

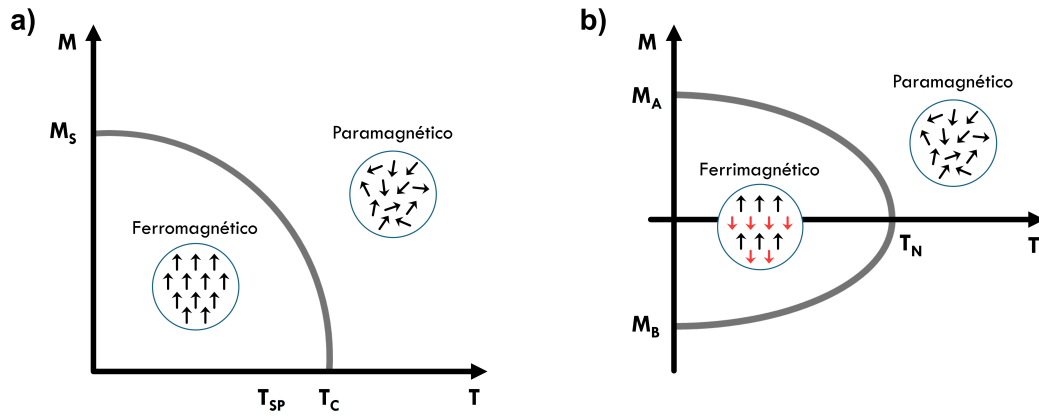

**Figura 1:** (a) Representação esquemática da variação da magnetização em função da temperatura para materiais ferromagnéticos. (b) Representação esquemática da variação da magnetização em função da temperatura para as sub-redes em materiais ferrimagnéticos.

material passa ao regime paramagnético. Em outras palavras, esta temperatura é a temperatura de Curie, que determina a transição do ordenamento ferromagnético para o paramagnético, como visualizada na Figura (1)a. Pode-se empregar o mesmo modelo utilizado no ferromagnetismo para descrever o ferrimagnetismo e o antiferromagnetismo. Louis Néel, ganhador do Prêmio Nobel de Física de 1970, descreveu esses dois sistemas usando duas sub-redes (A e B), de forma semelhante ao caso anterior, mas com alinhamento antiparalelo. Assim, a magnetização pode ser expressa como  $\mathbf{M} = \mathbf{M}_A + \mathbf{M}_B$ . Nesse caso, os campos moleculares são dados por:

$$\mathbf{B}_m^A = \mathbf{B}_{ext} + \lambda_{AB}\mathbf{M}_B + \lambda_{AA}\mathbf{M}_A, \quad (15)$$

$$\mathbf{B}_m^B = \mathbf{B}_{ext} + \lambda_{BA}\mathbf{M}_A + \lambda_{BB}\mathbf{M}_B. \quad (16)$$

Onde  $\lambda_{AB}$  e  $\lambda_{BA}$  são os coeficientes de campo molecular das interações de spins das sub-redes A com B e B com A respectivamente, e  $\lambda_{AA}$  e  $\lambda_{BB}$  são as contribuições de spins da mesma sub-rede A e da sub-rede B, respectivamente. Uma representação gráfica da magnetização das sub-redes em função da temperatura em um material ferrimagnético é apresentada na Figura (1)b,

onde a temperatura de ordenamento é agora denominada temperatura de Néel. As NPs à base de óxido de ferro de interesse tecnológico são na sua maioria materiais ferrimagnéticos.

### 2.1.3. Modelo de Stoner-Wolfarth

Ao estudar como a magnetização muda em relação ao campo magnético aplicado em materiais magnéticos, identificamos uma curva conhecida como histerese, termo cunhado em 1881 por James Ewing [13]. Essa curva começa com a aplicação de um campo magnético que aumenta até que o material atinja a magnetização de saturação ( $M_S$ ), ou seja, seu nível máximo de magnetização. Quando o campo é gradualmente reduzido a zero, o material ainda pode reter alguma magnetização, chamada magnetização remanente ( $M_R$ ). O campo necessário para reduzir a magnetização a zero é conhecido como campo coercitivo ( $H_C$ ). Confira o esquema ilustrativo de uma curva de histerese típica em materiais ferromagnéticos, apresentado na Figura (2)a. Cabe ressaltar que  $M_S$  é o parâmetro de ordem que representa adequadamente a transição ferromagnético-paramagnético em função

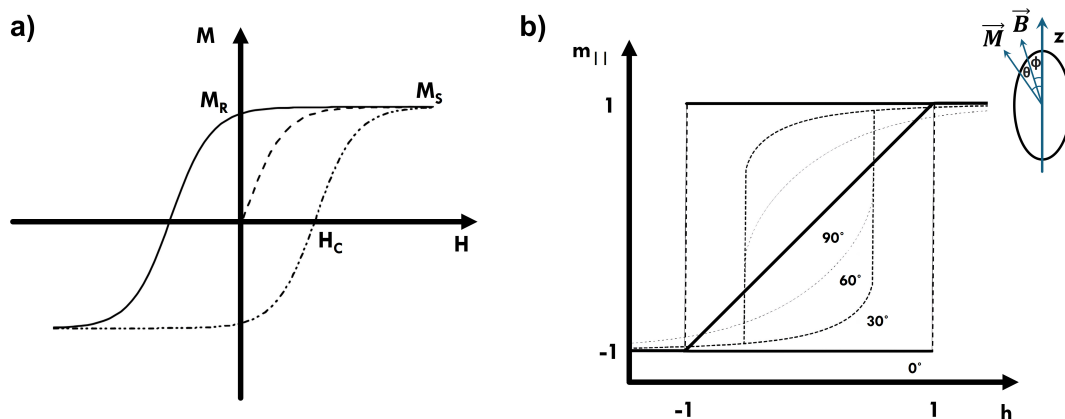

**Figura 2:** a) Esquema ilustrativo de uma curva de histerese comum em materiais ferromagnéticos. b) Curva de histerese segundo o modelo de Stoner-Wolfarth, variando com diferentes valores de  $\phi$ .

da temperatura, como explicado anteriormente (vide Figura 1(a)).

Experimentos com materiais magnéticos monocristalinos demonstraram também que a curva de histerese magnética dependia da orientação do campo magnético em relação aos eixos cristalinos do material [14]. Esses resultados experimentais causaram surpresa no início, pois a Hamiltoniana de Heisenberg é isotrópica, ou seja, não depende da direção cristalina. Posteriormente, foi identificado que havia um outro termo de energia muito importante denominado de energia de anisotropia, que em casos simples pode ser simulado por um termo de “single-ion” [13].

Um dos modelos pioneiros para explicar a histerese é o modelo de Stoner-Wolfarth, que considera que o material magnético é uma partícula monodomínio, que os momentos magnéticos dos átomos giram de forma coerente e que existe uma anisotropia uniaxial [15]. Portanto, nesse caso há dois termos de energia relevantes, o termo Zeeman e o de anisotropia magnética, onde a densidade de energia da partícula magnética pode ser escrita como:

$$\varepsilon = \frac{E}{V} = K_{ef} \text{sen}^2 \theta - \mu_0 M H \cos(\theta - \phi), \quad (17)$$

onde,  $\theta$  representa o ângulo entre a magnetização e o eixo de anisotropia, enquanto  $\phi$  refere-se ao ângulo entre o campo magnético aplicado e o eixo de anisotropia. O modelo têm como objetivo obter a configuração de menor energia para a magnetização, ou seja, se baseia na minimização da energia em  $\theta$ , logo

$$\left(\frac{\partial \varepsilon}{\partial \theta}\right)_{\theta=\theta_0} = 0, \quad \text{e} \quad \left(\frac{\partial^2 \varepsilon}{\partial^2 \theta}\right)_{\theta=\theta_0} > 0, \quad (18)$$

assim,

$$\left(\frac{\partial \varepsilon}{\partial \theta}\right)_{\theta=\theta_0} = 2K_{ef} \text{sen} \theta_0 \cos \theta_0 + \mu_0 M H \text{sen}(\theta_0 - \phi) = 0. \quad (19)$$

Ao aplicar a seguinte mudança de variável,  $h = \frac{H}{H_K}$  e  $H_K = \frac{2K_{ef}}{\mu_0 M}$ , obtêm-se

$$\frac{1}{2K_{ef}} \left(\frac{\partial \varepsilon}{\partial \theta}\right)_{\theta=\theta_0} = \text{sen} \theta_0 \cos \theta_0 + h \text{sen}(\theta_0 - \phi) = 0. \quad (20)$$

Sendo a condição de energia mínima,

$$\frac{1}{2K_{ef}} \left(\frac{\partial^2 \varepsilon}{\partial^2 \theta}\right)_{\theta=\theta_0} = \cos^2 \theta_0 - \text{sen}^2 \theta_0 + h \cos(\theta_0 - \phi) > 0. \quad (21)$$

Examinando a situação em que  $\phi = 0$ , encontramos  $\text{sen} \theta_0 (h + \cos \theta_0) = 0$ . Dessa forma, as soluções são  $\theta_0 = 0$ ,  $\theta_0 = \pi$  e  $\arccos(-h)$ . Entre as soluções encontradas,  $\theta_0 = 0$  e  $\theta_0 = \pi$  são os valores que minimizam a energia. Assim, após determinar os valores de  $\theta$  que

reduzem ao mínimo a energia, é possível analisar como a magnetização se projeta na direção do campo. A magnetização reduzida é definida como  $\mathbf{m} = \mathbf{M}/M_S$ , onde na direção do campo  $m_z = \cos \theta$ . Para  $\theta = 0$ , obtém-se  $h > -1$  e, portanto,  $m_z = 1$ . E para  $\theta = \pi$ , tem-se  $h < 1$ , logo,  $m_z = -1$ . Esse cálculo indica a existência de uma histerese quadrada quando o campo magnético é aplicado na direção do eixo de anisotropia. A curva de histerese de acordo com o modelo de Stoner-Wolfarth, para diferentes valores de  $\phi$ , é exibida na Figura (2)b. Casos mais realistas com o medido experimentalmente podem ser obtidos considerando uma média em todos os ângulos possíveis.

### 2.1.4. Superparamagnetismo

Partículas com diâmetros de apenas alguns nanômetros apresentam uma configuração conhecida como monodomínio, onde todos os spins dos átomos dentro da partícula estão alinhados na mesma direção. Uma partícula é classificada como monodomínio quando seu tamanho é reduzido para abaixo de um diâmetro crítico [16]. Este diâmetro crítico pode ser calculado através da equação  $D_c = \frac{72\sqrt{AK_{ef}}}{\mu_0 M_S^2}$ . Nesta equação,  $A$  representa uma constante associada à integral de troca, e  $K_{ef}$  é a constante de anisotropia efetiva. Em tal configuração, uma pequena variação térmica pode facilmente alterar a direção dessa orientação, indicando que a energia térmica envolvida é comparável à energia de anisotropia da partícula.

A anisotropia magnética possui diversas contribuições, como anisotropia de forma (magnetostática), magnetocristalina, magnetoestática, e superfície. A simetria depende do termo em questão. O caso mais simples é o uniaxial, onde a energia é descrita pela fórmula  $E = K_{ef} V \text{sen}^2 \theta$ , sendo  $V$  o volume da partícula, e  $\theta$  o ângulo entre o eixo de anisotropia e a magnetização. Quando o tempo necessário para uma mudança na orientação do momento magnético é menor que o tempo de medição, a partícula entra no regime superparamagnético, caracterizado pela ausência de coercividade, um traço comum em materiais ferromagnéticos e ferrimagnéticos, comportando-se de maneira similar a materiais paramagnéticos.

O tempo de relaxação de Néel-Brown, que determina o tempo necessário para a mudança de orientação [17], é dado por:

$$\tau_N = \frac{\sqrt{\pi}}{2} \tau_0 \sigma^{-\frac{1}{2}} e^{\sigma}, \quad (22)$$

onde  $\sigma = K_{ef} V / k_B T$  e  $\tau_0$  é uma constante de relaxação característica. Este tempo de relaxação diminui à medida que a temperatura aumenta e, quanto menor o volume da partícula e a constante de anisotropia, menor será seu valor. A teoria da relaxação da magnetização foi desenvolvida por Louis Néel em 1949 para explicar fenômenos magnéticos que dependem do tempo [18]. Em

1963, William Fuller Brown Jr. derivou essa expressão usando a equação de Fokker-Planck [19]. Pela relevância desse trabalho esse tempo de relaxação também é denominado relaxação de Néel-Brown. Há alguns anos, William T. Coffey e Yuri P. Kalmykov, publicaram um artigo de revisão discutindo diversas aplicações usando esse formalismo, inclusive efeitos de campo magnético, simetria da anisotropia magnética, entre outros, no tempo de relaxação magnética [20].

A energia da partícula magnética na presença de um campo magnético externo é dada por:

$$E = K_{ef}V \sin^2\theta - \mu B \cos(\theta - \phi). \quad (23)$$

Como dito anteriormente, o primeiro termo da equação (23) corresponde à energia de anisotropia e o segundo à energia Zeeman. Considerando o campo aplicado na direção do eixo de anisotropia, a diferença de energia  $\Delta E$  entre os estados de energia máxima ( $\cos\theta = -h$ ) e mínima ( $\theta = \pi$ ) para essas configurações é dada por:

$$\Delta E = K_{ef}V(1 - h^2) - \mu\mu_0H(1 - h), \quad (24)$$

onde  $h$  é a razão  $H/H_k$  e  $H_k = 2K_{ef}/\mu_0M_s$ . Se o tempo de medida experimental é igual ao tempo de relaxação  $t_m \equiv \tau = \tau_0 \exp\left(\frac{\Delta E}{k_B T}\right)$ , com  $\Delta E$  sendo:

$$\Delta E = K_{ef}V \left(1 - \frac{H}{H_k}\right)^2. \quad (25)$$

Como  $H = H_C$  é possível mostrar que

$$H_C = H_k(1 - \kappa^{1/2}), \quad (26)$$

com  $\kappa = \frac{k_B T}{K_{ef}V} \ln\left(\frac{t_m}{\tau_0}\right)$ . Note que o termo pode ser escrito como  $\kappa = \frac{T}{T_B} = \frac{V_{SP}}{V}$ , sendo o volume superparamagnético  $V_{SP}$  e a temperatura de bloqueio  $T_B$  definidos como:

$$V_{SP} = \frac{k_B T}{K_{ef}} \ln\left(\frac{t_m}{\tau_0}\right), \quad T_B = \frac{K_{ef}V}{k_B} \frac{1}{\ln(t_m/\tau_0)}. \quad (27)$$

O campo coercitivo pode ser escrito em termos do diâmetro superparamagnético  $D_{SP}$ , ou de  $T_B$ , como descrito na equação abaixo:

$$H_C = H_k \left[1 - \left(\frac{D_{SP}}{D}\right)^{\frac{3}{2}}\right] = H_k \left[1 - \left(\frac{T}{T_B}\right)^{\frac{1}{2}}\right]. \quad (28)$$

Esta equação é válida para  $D > D_{SP}$  ( $T < T_B$ ) e indica que o campo coercitivo é nulo quando  $D \leq D_{SP}$  ( $T \geq T_B$ ), categorizando a partícula como superparamagnética. Uma visualização de como o campo coercitivo se altera com diferentes diâmetros das partículas é mostrada na Figura (3)a, já a representação gráfica da dependência com a temperatura é mostrada na Figura (3)b.

De fato, devido à semelhança entre o comportamento superparamagnético e o paramagnético, podemos utilizar um modelo semelhante ao discutido na

subsubseção (2.1.1). No superparamagnetismo, assume-se que os momentos magnéticos atômicos dentro da partícula mudam sua orientação de forma coerente. Para modelar isso, podemos adotar uma abordagem semi-clássica do paramagnetismo. Consideremos os momentos de dipolo magnético  $\mu$  em um ângulo  $\theta$  em relação a um campo magnético  $\mathbf{B}$ , orientado ao longo do eixo  $z$ . A energia dos momentos magnéticos,  $E$ , e a componente  $z$  do momento,  $\mu_z$ , são dados por  $E = -\mu B \cos\theta$  e  $\mu_z = \mu \cos\theta$ , respectivamente. Assumindo que todos os ângulos  $\theta$  são igualmente prováveis, a distribuição de  $\theta$  é proporcional à área de um anel na superfície de uma esfera unitária, expressa como  $\frac{1}{2}\sin\theta d\theta$ . A probabilidade  $p(\theta)d\theta$  é o produto desse fator geométrico com o fator de Boltzmann

$$p(\theta)d\theta = \frac{1}{2}\sin\theta e^{B\mu \cos\theta/k_B T} d\theta. \quad (29)$$

O momento magnético médio ao longo de  $\mathbf{B}$  é então calculado por:

$$\langle\mu_z\rangle = \frac{\int \mu_z p(\theta)d\theta}{\int p(\theta)d\theta}. \quad (30)$$

Após substituir variáveis  $y = \mu B/k_B T$  e  $x = \cos\theta$ , encontramos

$$\langle\mu_z\rangle = \mu \frac{\int_{-1}^1 x e^{xy} dx}{\int_{-1}^1 e^{xy} dx}. \quad (31)$$

Utilizando a relação hiperbólica  $e^a - e^{-a} = 2\sinh(a)$ , após fazermos a integral encontramos:

$$\frac{\langle\mu_z\rangle}{\mu} = \coth(y) - \frac{1}{y} \equiv L(y), \quad (32)$$

onde  $L(y)$  é a função de Langevin. A magnetização  $M$  é dada por  $M = n\langle\mu_z\rangle$  e a magnetização de saturação, quando todos os momentos magnéticos estão alinhados, é  $M_S = n\mu$ . Portanto, a relação da magnetização para o modelo superparamagnético é  $M = M_S L(y)$ . Este modelo ilustra como a magnetização varia no regime superparamagnético em função do campo aplicado, como mostrada na Figura (3)c. Note que a função de Langevin é equivalente a função de Brillouin no limite de spin muito alto, já que nesse caso o somatório na equação (1) passa para a integral da equação (30). Por esse motivo, alguns autores denominam o modelo superparamagnético de modelo de spin gigante, o que também vai de encontro com a suposição de que os spins de uma nanopartícula respondem ao campo magnético de forma coerente como um momento magnético único.

O conceito de superparamagnetismo, apesar de semelhante ao paramagnetismo, apresenta diferenças cruciais que são evidenciadas quando observamos o comportamento de NPs sob diferentes condições de medição. No superparamagnetismo, o momento magnético de

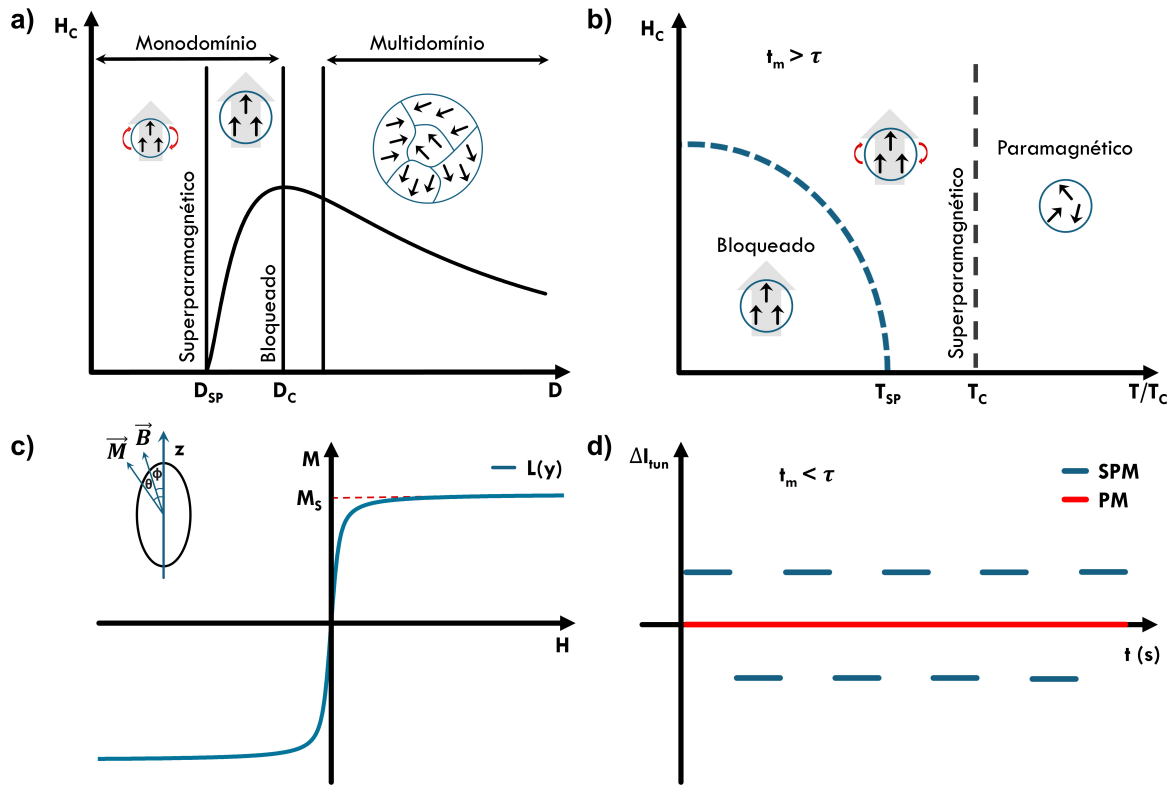

**Figura 3:** (a) Gráfico ilustrando a variação do campo coercitivo em função do diâmetro da partícula. (b) Variação do campo coercitivo com a temperatura para uma partícula de monodomínio. (c) Representação esquemática da função de Langevin. (d) Esquema da variação da corrente de tunelamento em um microscópio de corrente por tunelamento, que utiliza o conceito de tunelamento quântico e é influenciado pelas propriedades eletrônicas da amostra e pelo estado magnético dos elétrons na superfície, destacando as diferenças entre partículas paramagnéticas e superparamagnéticas.

uma nanopartícula pode mudar de orientação devido a pequenas flutuações térmicas, onde o tempo de relaxação é o período necessário para que a orientação do momento magnético de uma partícula mude. Se a medição da magnetização é feita em um período maior que o tempo de relaxação, a orientação dos momentos magnéticos terá tempo suficiente para se randomizar devido às variações térmicas, resultando em uma magnetização média nula. Isso pode levar à interpretação errônea de que estamos observando um comportamento puramente paramagnético, onde magnetização média resultante também é zero mas devido aos momentos magnéticos estarem orientados de forma aleatória.

Observe que no superparamagnetismo há ordenamento magnético de curto alcance dos spins de uma nanopartícula, os quais estão em uma temperatura menor que a temperatura crítica, enquanto no paramagnético não há ordenamento entre os spins da partícula (vide Figura (3)b). É comum definir o superparamagnetismo como aquele regime em que o campo coercitivo é nulo, mas é relevante lembrar que o parâmetro de ordem que define a transição para a fase paramagnética é a magnetização de saturação, e não o campo coercitivo. Outro ponto importante é definir o regime em que o campo coercitivo é não nulo como bloqueado, ao invés de “ferromagnético” como alguns autores denominam,

para evitar confusões com ordenamento dos spins, que no caso do óxido de ferro é na verdade ferrimagnético.

Adicionalmente, se a medição é realizada em um intervalo menor que o tempo de relaxação, como por exemplo, usando um microscópio de corrente por tunelamento spin polarizado (SP-STM – acrônimo para “Spin Polarized Scanning Tunneling Microscope”), observamos um comportamento diferente entre materiais no regime superparamagnético e na fase paramagnética. O SP-STM, que se baseia no conceito de tunelamento, é sensível à densidade de estados de superfície spin dependentes. Em uma nanopartícula superparamagnética, a orientação do momento magnético no momento da medição influencia diretamente a corrente de tunelamento. Enquanto no paramagnetismo a orientação aleatória dos spins dos elétrons não impacta significativamente a corrente de tunelamento, no superparamagnetismo, a direção do momento magnético da nanopartícula pode alterar a corrente detectada [21]. Uma representação esquemática da variação da corrente de tunelamento observada em um SP-STM é apresentada na Figura (3)d. Desse modo, essas particularidades ressaltam as diferenças significativas entre o superparamagnetismo e o paramagnetismo, especialmente quando observados em condições experimentais que permitem análises em escalas de tempo iguais ou inferiores ao tempo de relaxação magnética.

## 2.2. Estabilidade coloidal

A síntese de NPs magnéticas não garante sua aplicação biomédica, sendo necessário estabilizá-las em um meio. Fluidos magnéticos, ou ferrofluidos, são substâncias formadas por pequenas partículas magnéticas suspensas em um líquido. Vamos começar pela história: os primeiros fluidos magnéticos foram criados no século XVII. Naquela época, partículas de ferro eram moídas até se tornarem muito pequenas e depois misturadas em um líquido. No entanto, esses fluidos não eram muito estáveis porque não tinham um revestimento molecular adequado para manter as partículas dispersas.

O grande salto no desenvolvimento desses fluidos ocorreu na década de 1960 com Solomon S. Papell na NASA [22]. Ele inventou uma nova forma de produzir fluidos magnéticos com a intenção de usá-los para mover combustível em foguetes na ausência de gravidade. Papell usou uma técnica de moagem para reduzir as partículas de um metal ou óxido metálico até a escala nanométrica, em um processo assistido por agentes químicos. Apesar de eficaz, essa técnica era lenta e pouco eficiente.

Com o passar do tempo, novos métodos químicos foram desenvolvidos, tornando a produção de fluidos magnéticos mais rápida e confiável. Hoje, esses fluidos são feitos com núcleos magnéticos nanométricos revestidos por agentes estabilizantes, que podem ser íons (em fluidos iônicos) ou cadeias moleculares que atuam como surfactantes (em fluidos surfactados). Eles são dispersos em líquidos que podem ser polares (como a água) ou apolares (como óleos), dependendo da aplicação desejada.

Esse avanço permite que os fluidos magnéticos sejam usados em uma variedade ainda maior de aplicações tecnológicas, desde a engenharia até a medicina. As NPs presentes nesses fluidos podem ser modeladas como esferas que funcionam como monodomínios magnéticos. Isso significa que cada nanopartícula possui um único domínio magnético, onde todos os momentos magnéticos estão alinhados na mesma direção, como já discutido anteriormente. A estabilidade desses fluidos vem de um delicado equilíbrio entre forças que atuam sobre as NPs, que está associada a quatro interações interpartículas: interação de van der Waals, interação dipolar magnética, repulsão estérica e repulsão eletrostática [23].

A interação de van der Waals entre duas partículas esféricas idênticas é dada pela expressão de Hamaker [24, 25]:

$$E_v = -\frac{A}{6} \left( \frac{2}{l^2 + 4l} + \frac{2}{(l+2)^2} + \ln \frac{l^2 + 4l}{(l+2)^2} \right), \quad (33)$$

onde  $l = 2s/d$  sendo  $s$  a distância entre as superfícies das partículas e  $d$  o diâmetro da partícula. O chamado coeficiente de Hamaker  $A$  depende das propriedades da nanopartícula e do solvente no qual está suspensa e é dado para duas partículas idênticas por:

$$A = \frac{3}{4} k_B T \left( \frac{\epsilon_p - \epsilon_s}{\epsilon_p + \epsilon_s} \right)^2 + \frac{3h\nu_c (n_p^2 - n_s^2)^2}{16\sqrt{2}(n_p^2 - n_s^2)^{2/3}}, \quad (34)$$

onde  $\epsilon_p$  é a constante dielétrica da partícula,  $\epsilon_s$  a constante dielétrica do solvente,  $h$  a constante de Planck,  $\nu_c$  a frequência característica de absorção,  $n_p$  o índice de refração da partícula e  $n_s$  o índice de refração do solvente.

A interação dipolar magnética possui uma dependência com a distância e a orientação dos momentos magnéticos da partícula e é dada por:

$$E_d = \frac{\mu_0}{4\pi} \left( \frac{\vec{\mu}_i \cdot \vec{\mu}_j}{r^3} - \frac{3(\vec{\mu}_i \cdot \vec{r})(\vec{\mu}_j \cdot \vec{r})}{r^5} \right), \quad (35)$$

onde o módulo do momento magnético de uma nanopartícula é  $\mu = \frac{\pi M_s d^3}{6}$ .

Notando que essas interações possuem, em geral, caráter atrativo, resultando na possibilidade da formação de agregados, vê-se necessário o uso de forças repulsivas, que se dá através do recobrimento da superfície das NPs, de modo a manter a estabilidade do fluido magnético. Isto pode ser feito através da repulsão estérica, da repulsão eletrostática ou até mesmo uma combinação de ambas.

A repulsão estérica entre duas partículas esféricas idênticas é dada por [26]:

$$\frac{E_R}{k_B T} = \frac{\pi d^2 \xi}{2} \left[ 2 - \frac{(l+2)}{t} \ln \left( \frac{1+t}{1+l/2} \right) - \frac{l}{t} \right], \quad (36)$$

para  $s \leq 2\delta$ , e

$$\frac{E_R}{k_B T} = 0, \quad (37)$$

para  $s > 2\delta$ , onde  $l = 2s/d$  e  $t = 2\delta/d$ , sendo  $\delta$  a espessura da camada de cobertura. Na equação,  $\xi$  é chamado de “grafting”, que é número de moléculas absorvidas por unidade de área na superfície da nanopartícula. Os fluidos magnéticos que utilizam a repulsão estérica para manter sua estabilidade são chamados, em geral, de fluidos surfactados.

Na Figura (4), são apresentados gráficos que mostram como as energias variam em função da distância de superfície a superfície entre duas partículas esféricas idênticas. Na Figura (4)a, vemos que a energia total combinada é negativa, o que tende a favorecer a formação de agregados. Isso acontece principalmente porque há uma baixa concentração de moléculas na superfície de cada nanopartícula, resultando em uma baixa energia de repulsão (ou energia estérica), além de uma energia dipolar considerável. Na Figura (4)b, observamos que o aumento na quantidade de moléculas na superfície da nanopartícula eleva a repulsão estérica, aumentando assim a barreira energética que impede a formação de agregados. Este é um conceito chave nas técnicas de revestimento de NPs, que são adaptadas usando diferentes moléculas para atender às necessidades específicas de diversos tipos de NPs.

Além disso, o tamanho da nanopartícula também é crucial, pois influencia o equilíbrio entre forças de



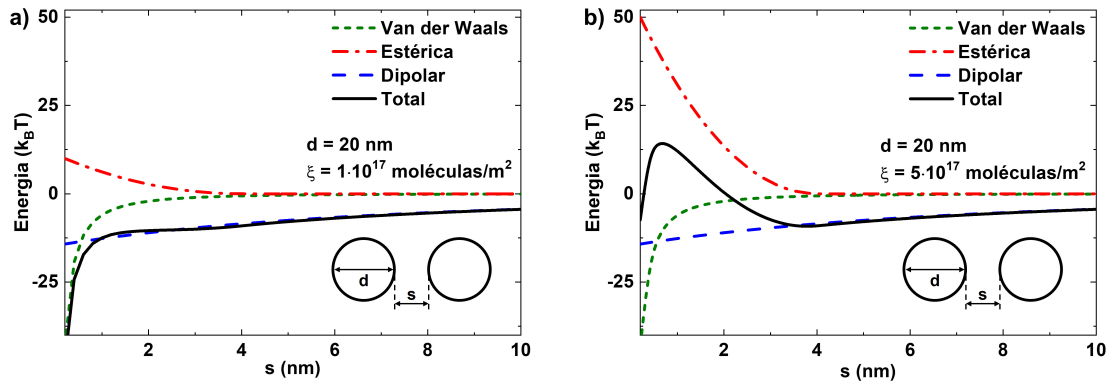

**Figura 4:** Energia de interação (dipolar, estérica, van der Waals e total) versus distância de superfície a superfície para diferentes sistemas considerando duas partículas idênticas com diâmetros de 20 nm e “grafting” distintos (a)  $1 \times 10^{17}$  moléculas/m<sup>2</sup> e (b)  $5 \times 10^{17}$  moléculas/m<sup>2</sup>. Os parâmetros da simulação incluem: constante de Hamaker  $A = 5 \times 10^{-20}$  J, magnetização de saturação da nanopartícula  $M_s = 417$  emu/cm<sup>3</sup>, e espessura da camada de surfactante  $\delta = 2$  nm.

van der Waals e dipolar magnética: partículas maiores tendem a ter uma maior influência atrativa devido essas forças. Sendo que, as interações de van der Waals são mais efetivas a curta distância, enquanto a interação dipolar ainda predomina quando as NPs estão mais afastadas. Naturalmente, em partículas com diâmetros menores, a interação dipolar magnética é menos eficaz. É importante destacar que as propriedades de ferrofluidos, como viscosidade e densidade, bem como características magnéticas como magnetização e susceptibilidade, são afetadas pela concentração de partículas e em algumas situações pela presença de aglomerados de NPs [24].

Outra força de repulsão que pode inibir a formação de aglomerados é a eletrostática, que resulta da interação entre as camadas de cargas que se formam ao redor da superfície das NPs, conhecida como teoria DLVO, em homenagem aos pesquisadores Derjaguin, Landau, Verweij, Overbeek, quando considera esse termo repulsivo e o termo atrativo de van der Waals [26]. A interação eletrostática entre duas partículas idênticas pode ser dada por:

$$E_e = 4\epsilon d^2 \left( \frac{k_B T}{q} \gamma \right)^2 \frac{e^{-\kappa(r-d)}}{r}, \quad (38)$$

onde  $\gamma = \text{tgh} \left( \frac{q\psi_s}{4k_B T} \right)$ , em que,  $\epsilon$ ,  $q$ ,  $\kappa$  e  $\psi_s$  são, respectivamente, a permissividade do líquido carreador, a carga do contra-íon da dupla camada elétrica, o inverso do raio de Debye e o potencial de Stern, também conhecido como potencial zeta. Portanto, o equilíbrio entre essas forças atrativas e repulsivas determina quão estável será o fluido magnético e quão efetivamente ele pode ser utilizado em aplicações tecnológicas.

### 3. Aplicações

As NPs de óxido de ferro podem ser aplicadas nos mais diversos ramos da ciência. Nosso foco, porém, se encontra em aplicações biomédicas para diagnóstico e

tratamento de vários tipos de doenças. Aqui detalharemos algumas destas aplicações.

#### 3.1. Anemia

As NPs de óxido de ferro têm sido empregadas com sucesso na medicina há quase um século, provando ser seguras e eficazes em várias aplicações clínicas. Aprovadas pela FDA (Food and Drug Administration), essas NPs são utilizadas para diagnóstico de câncer [27], terapia de hipertermia [28] e tratamento de anemia por deficiência de ferro (ADF) [29]. Para tratar a ADF, o método envolve o uso de terapia parenteral, onde as NPs de óxido de ferro são administradas de forma intravenosa. Estas são frequentemente preparadas como complexos de óxido de ferro e carboidrato, o que ajuda a estabilizar a formulação e controlar a liberação de ferro na corrente sanguínea.

O sucesso das formulações de ferro injetáveis no tratamento da ADF se deve, em parte, às interações das NPs com o sistema imunológico, uma interação geralmente evitada em outras aplicações nanotecnológicas. No caso da ADF, essa interação é vantajosa, pois facilita a entrega eficiente de ferro utilizando as vias imunológicas. Isso é particularmente útil para pacientes que não toleram suplementos de ferro orais ou para os quais o ferro oral é insuficiente, permitindo um aumento direto nos níveis de ferro, contornando os desafios da absorção gastrointestinal.

Estudos clínicos têm comprovado a eficácia e a segurança dessas NPs, consolidando sua importância no tratamento da ADF, especialmente em pacientes com condições mais complexas onde outras terapias podem ser ineficazes [30]. Pesquisas estão em andamento para entender melhor como essas NPs interagem com o sistema imunológico e as vias de metabolismo do ferro no corpo. Por exemplo, estudos recentes em camundongos usando NPs para tratamento de anemia demonstraram que a biodegradação das NPs promove a polarização de

macrófagos (célula importante do sistema imunológico) diminuindo a taxa de crescimento tumoral, assim como de metástases [31].

### 3.2. Agentes de contraste em ressonância magnética

A Imagem por Ressonância Magnética Nuclear (MRI – acrônimo para “Magnetic Resonance Imaging”) é um método sofisticado de diagnóstico por imagem que, diferentemente dos raios-X ou tomografias computadorizadas, utiliza campos magnéticos DC e AC (faixa da radiofrequência, MHz) em vez de radiação ionizante. No equipamento de MRI, um campo magnético intenso alinha o spin nuclear dos prótons presentes nos núcleos dos átomos de hidrogênio do corpo. Em seguida, pulsos de campo magnético na faixa radiofrequência, na condição de ressonância do spin nuclear, são aplicados para excitar esses prótons, realinhando temporariamente seus momentos magnéticos. Após o término desses pulsos, os spins dos prótons relaxam e retornam ao seu estado original, gerando sinais que são capturados e convertidos em imagens detalhadas do corpo. Essas imagens refletem as diferenças nas intensidades das ressonâncias dos spins dos prótons, geralmente de prótons de água, que são proporcionais às concentrações locais de prótons e podem ser moduladas pelas taxas de relaxamento longitudinal ( $R_1 = 1/T_1$ ) e transversal ( $R_2 = 1/T_2$ ). Dessa forma, é possível distinguir claramente diferentes tecidos do corpo, devido às variações em sua composição química e física, o que facilita o diagnóstico preciso de diversas condições médicas. As NPs superparamagnéticas, são amplamente utilizadas como agentes de contraste  $T_2$  na imagem por MRI. Devido ao seu pequeno tamanho e propriedades magnéticas, essas NPs conseguem alterar o campo magnético local ao seu redor, afetando a condição de ressonância, as taxas de relaxação dos spins nucleares de hidrogênio próximos a elas. Isso leva a uma mudança na intensidade do sinal nas imagens de MRI, melhorando a visibilidade de estruturas ou anormalidades no corpo, como tumores ou áreas inflamadas. Para intensidades de campo magnético elevadas (superiores a 1 T), a taxa de relaxamento transversal pode ser descrita por [32]:

$$R_2 = \frac{16}{45} f \tau_D (\Delta\omega)^2, \quad (39)$$

onde  $f$  é a fração volumétrica de partículas magnéticas,  $\tau_D = d^2/4D$  é o tempo de correlação com  $D$  sendo o coeficiente de difusão da água. E,  $\Delta\omega = \gamma_H \mu_0 M_S/3$ ,  $\gamma_H$  sendo a razão giromagnética do próton.

Uma das principais vantagens das NPs magnéticas em comparação com os agentes à base de gadolínio por exemplo, é a sua biocompatibilidade e a capacidade de produzir um aumento significativo no contraste em concentrações mais baixas, devido ao seu forte momento magnético. Elas aumentam principalmente a taxa de relaxamento transversal  $R_2$ , o que resulta em uma diminuição da intensidade do sinal em imagens ponderadas

em  $T_2$ , tornando-as excelentes para criar um contraste negativo. Além disso, ao acoplar moléculas específicas de direcionamento à superfície dessas NPs, é possível direcioná-las a acumular-se em tecidos ou ambientes celulares específicos, aumentando a especificidade da imagem diagnóstica. Por outro lado, sua limitação refere-se a efeitos de distorção da imagem de MRI quando em alta concentração.

### 3.3. Nanocarreadores

Nanocarreadores são sistemas em escala nanométrica (geralmente com diâmetro de aproximadamente 100 nm) que podem transportar diversos agentes diagnósticos, terapêuticos ou ambos. Vários tipos já foram desenvolvidos, como lipossomas (vesículas que contêm uma bicamada lipídica e mimetizam parte da membrana celular), nanocápsulas e nanoesferas poliméricas, dendrímeros, NPs lipídicas, NPs camufladas com membrana celular, entre outros. Em geral, esses nanocarreadores magnéticos são utilizados para transportar fármacos como doxorrubicina [33], paclitaxel [34, 35], entre outros. Nessa estratégia muitas dessas NPs são recobertas com polietilenoglicol (PEG) para aumentar o tempo de circulação.

Além disso, alguns autores sugerem que o gradiente de campo magnético pode ser utilizado para vetorizar esses agentes terapêuticos para regiões de interesse, mediados pela força magnética [36]. Nesse caso a velocidade magnetoforética de uma nanopartícula em um meio líquido é dada pela equação [37]:

$$v = \frac{M_S}{18\eta} \left( \frac{\partial B}{\partial z} \right) D^2, \quad (40)$$

onde  $\eta$  é a viscosidade do meio líquido, e  $\partial B/\partial z$  é o gradiente do campo magnético. É interessante notar que o termo escala com o quadrado do diâmetro da nanopartícula. Isso indica que apenas nanoestruturas maiores possuem um efeito de vetorização magnética efetivo. Portanto, para essa aplicação NPs com pequenas dimensões precisam ser agrupadas em nanocarreadores maiores para efetivamente transportar o agente terapêutico.

Recentemente, os nanocarreadores baseados em membrana celular de eritrócitos se destacam por melhorar o tempo de circulação no sangue. Esse método biomimético tem sido amplamente estudado na última década e surgiu como uma alternativa ao método padrão anterior baseado em polietilenoglicol, já que vários estudos mostraram que NPs revestidas com PEG ainda sofrem uma remoção significativa após a primeira dose [38]. Membranas para o desenvolvimento de nanocarreadores são derivadas de diversos tipos de células, como plaquetas, glóbulos vermelhos (hemácias), glóbulos brancos, células-tronco, células cancerígenas e bactérias. Além disso, membranas podem ser usadas para revestir diferentes tipos de NPs, onde o tipo de membrana celular pode ser selecionado conforme a aplicação [38–42].

### 3.4. Hipertermia magnética

A hipertermia magnética é uma terapia que utiliza NPs magnéticas para o tratamento de câncer [28, 43–45]. Considerando as equações de Maxwell, teorema de Poynting e primeira lei da termodinâmica, podemos mostrar que a geração de calor por meio eletromagnético é regida pela equação

$$\oint dQ = \int_V \left( \int_{t_0}^t \mathbf{E} \cdot \mathbf{J} dt - \oint \mathbf{P} \cdot d\mathbf{E} - \oint \mu_0 \mathbf{M} \cdot d\mathbf{H} \right) dV \quad (41)$$

onde  $\mathbf{E}$ ,  $\mathbf{J}$ ,  $\mathbf{P}$ ,  $\mu$ ,  $\mathbf{M}$  e  $\mathbf{H}$  representam respectivamente o campo elétrico, a densidade de corrente livre, a polarização elétrica, a permeabilidade magnética, a magnetização e o campo magnético (auxiliar, na nomenclatura do livro do Griffiths [46]). Observe que a dissipação de calor do sistema é dada de três maneiras. A primeira integral da Equação (41) representa a perda por correntes parasitas, que são correntes induzidas na presença de um campo elétrico. Neste caso, a densidade de corrente induzida pode dissipar calor pelo efeito Joule. A segunda integral na Equação (41) representa a chamada perda dielétrica. Basicamente, a perda dielétrica consiste na polarização elétrica devido à influência de um campo elétrico (histerese elétrica). E a terceira integral da Equação (41) é a perda por histerese magnética devido à resposta da magnetização a um campo magnético aplicado. A perda por histerese magnética é a principal contribuição para o aquecimento das NPs magnéticas. Com isso, a potência dissipada por volume de amostra magnética pode ser obtida a partir da teoria do regime linear (TRL) e depende de termos importantes, como mostrado na equação  $\frac{P_{ot}}{V} = \mu_0 \pi f H_0^2 \chi''$ , onde  $H_0$  é a amplitude do campo alternado aplicado,  $f$  é a frequência do campo, e  $\chi''$  é a parte imaginária da susceptibilidade magnética [47].

Uma maneira de determinar a susceptibilidade complexa é considerando a equação de movimento de um dipolo rígido, que para um modelo simplificado, também conhecido como modelo de Debye, é dada pela equação

$$\frac{dM(t)}{dt} = \frac{1}{\tau} (M_0(t) - M(t)), \quad (42)$$

onde  $\tau$  é o tempo de relaxação, a magnetização de equilíbrio é  $M_0(t) = \chi_0 H_0 e^{i\omega t}$ , enquanto a magnetização do sistema é  $M(t) = \chi H_0 e^{i\omega t}$ , com  $\chi_0$  a susceptibilidade no equilíbrio e  $\chi$  a susceptibilidade da nanopartícula ( $\chi = \chi' - i\chi''$ ). Resolvendo essa equação, encontra-se para a parte real da susceptibilidade  $\chi' = \frac{\chi_0}{1+(\omega\tau)^2}$  e para a imaginária  $\chi'' = \frac{\omega\tau\chi_0}{1+(\omega\tau)^2}$ . Note que a hipertermia magnética na TRL é proporcional a parte imaginária da susceptibilidade. O tempo de relaxação pode ser o de Néel-Brown (equação (22)) ou o browniano,  $\tau_B = \frac{3\eta V_H}{k_B T}$  com  $V_H$  o volume hidrodinâmico, a depender de parâmetros da nanopartícula como diâmetro e anisotropia magnética, entre outros [17].

Para casos em que a magnetização responde de forma não linear ao campo, a solução é obtida resolvendo a equação de Landau–Lifshitz, dada por:

$$\frac{d\mathbf{M}}{dt} = -\gamma \mathbf{M} \times \mathbf{H}_{\text{eff}} - \lambda' \mathbf{M} \times (\mathbf{M} \times \mathbf{H}_{\text{eff}}), \quad (43)$$

onde  $\gamma$  é a razão giromagnética do elétron e  $\lambda'$  é um parâmetro fenomenológico de amortecimento, enquanto o campo efetivo  $H_{\text{eff}}$  possui contribuições do campo magnético aplicado, campo de anisotropia, e um termo randômico devido a flutuação térmica, entre outros [48].

A primeira aplicação dessa tecnologia foi proposta por Gilchrist e colaboradores em 1957 [49], utilizando NPs de óxido de ferro em linfonodos de cães já falecidos, expostos a um campo magnético alternado. Após décadas de estudos, em 2001, Jordan e colaboradores desenvolveram um equipamento de hipertermia para uso clínico, voltado principalmente para glioblastoma e câncer de próstata. Em 2007, Maier-Hauff e equipe mostraram que a combinação de NPs magnéticas com radioterapia era viável e tolerável em humanos, através de um estudo com pacientes de glioblastoma [50]. Este estudo foi expandido em 2011, indicando um aumento na sobrevida dos pacientes [51]. Como consequência, essa terapia foi aprovada na Europa para o tratamento de tumores cerebrais, sempre em conjunto com a radioterapia.

Apesar dos avanços, ainda existem desafios significativos. Há uma necessidade contínua de melhorar as características das NPs, como tamanho, forma e biocompatibilidade, para garantir a segurança e eficácia do aquecimento. Adicionalmente, há limites para a frequência e a amplitude do campo magnético aplicado, para evitar danos por aquecimento indesejado nas células saudáveis. O desenvolvimento de nanoaquecedores eficientes para aplicações em baixa amplitude de campo magnético tem sido um foco de pesquisa recente, buscando maximizar a eficácia terapêutica enquanto se minimizam os riscos [28]. Essa terapia térmica pode ser usada para a liberação de agentes terapêuticos em regiões específicas do corpo, minimizando efeitos colaterais [33–35]. Artigos recentes apontam ainda que a ausência de uma termometria eficaz nesse método, limita a atuação clínica da hipertermia magnética [28, 52].

### 3.5. Terapia fototérmica

A terapia fototérmica (PTT – acrônimo para “Photothermal Therapy”) com NPs magnéticas é uma área emergente na medicina que utiliza luz para induzir um aumento de temperatura local e tratar doenças [42, 45, 53]. Diferente da hipertermia magnética que já é aplicada em humanos, a PTT ainda está em fases iniciais de estudos clínicos [54]. Esta técnica se baseia no uso de nanoestruturas, como as de ouro e óxidos de ferro, que são ativadas por luz para produzir calor e destruir tecidos doentes.

Um dos desafios da PTT é a limitação na penetração da luz nos tecidos, o que dificulta o tratamento de

doenças profundas ou extensas. Para contornar isso, utiliza-se a entrega intersticial de luz por meio de fibra óptica [55]. Apesar da luz ser absorvida tanto por tecidos saudáveis quanto por malignos, o desenvolvimento de agentes de conversão fototérmica permite um controle mais preciso da entrega de calor, minimizando danos indesejados por aquecimento não específico, já que nesse caso é possível atuar com potência do laser baixa o suficiente para minimizar danos a tecidos saudáveis.

A seleção de fontes de luz laser na região do infravermelho próximo (NIR acrônimo para “Near-Infrared”) é uma estratégia interessante, já que essa faixa do espectro tem melhor penetração nos tecidos biológicos e menor absorção por componentes como água, melanina e hemoglobina. Isso reduz o aquecimento não seletivo e permite tratamentos mais profundos. Existem três “janelas biológicas” ou “janelas terapêuticas” no NIR que são especialmente úteis para a PTT devido à sua menor absorção pelos componentes padrão dos tecidos: a primeira varia de 650 nm a 940 nm; a segunda, de 1000 nm a 1400 nm; e a terceira, de 1550 nm a 1800 nm.

Na TRL aplicada a perda dielétrica temos que  $\frac{P_{\text{ot}}}{V} = \epsilon_0 \pi f E_0^2 \chi_e''$ , ou seja depende da parte imaginária da susceptibilidade elétrica  $\chi_e''$ , do quadrado da amplitude do campo elétrico da luz incidente  $E_0$  e da frequência do campo elétrico  $f$ .

A geração de calor no PTT é descrita semi-classicamente pelo modelo de Lorentz. O modelo de Lorentz explica o fenômeno de absorção de frequências discretas pelos átomos ao considerá-los como dipolos oscilantes. Nesse caso, assume-se que o campo elétrico da luz incidente faz com que os elétrons do material (mais leves) oscilem ao redor dos núcleos (mais massivos e, portanto, permanecem “parados”) dos átomos desse material, como se estivessem presos a esses núcleos por molas.

Se  $x$  representa o deslocamento de um elétron, induzido pela interação com o campo elétrico da onda incidente (deslocamento  $x$  e campo elétrico  $\mathbf{E}$  na mesma direção e sentido de oscilação, no caso unidimensional), pela 2ª Lei de Newton, temos que:

$$m \frac{d^2 \mathbf{x}}{dt^2} + b \frac{d\mathbf{x}}{dt} + K\mathbf{x} = q\mathbf{E}, \quad (44)$$

onde  $m$  representa a massa do elétron;  $q$  sua carga;  $\mathbf{x}$  sua posição em um dado momento;  $b$  uma constante de amortecimento, que está associada à restrição do movimento do elétron pela rede cristalina;  $K$  a constante de mola ou constante de rigidez do movimento oscilatório; e  $\mathbf{E}$  o campo elétrico da onda eletromagnética incidente. Usando notação complexa para campos harmônicos no tempo ( $\mathbf{E} = E_0 e^{i\omega t}$  e  $\mathbf{x} = x_0 e^{i\omega t}$ ), é fácil demonstrar que a solução é dada por:

$$\mathbf{x} = \frac{q/m}{(\omega_0^2 - \omega^2) + i\gamma\omega} \mathbf{E}, \quad (45)$$

onde  $\omega_0 = \sqrt{\frac{K}{m}}$  a frequência natural de oscilação e  $\gamma = \frac{b}{m}$  o fator de amortecimento. Assim, dado o momento de dipolo elétrico  $\mathbf{p} = q\mathbf{x}$  e a polarização elétrica  $\mathbf{P} = N\mathbf{p} = Nq\mathbf{x} = \epsilon_0 \chi_e \mathbf{E}$ , com  $N$  sendo o número de osciladores por unidade de volume e  $\epsilon_0$  a permissividade elétrica do vácuo, encontra-se que

$$\begin{aligned} \epsilon' &= 1 + \chi_e' = 1 + \frac{\omega_p^2 (\omega_0^2 - \omega^2)}{(\omega_0^2 - \omega^2)^2 + \gamma^2 \omega^2} \\ \epsilon'' &= \chi_e'' = \frac{\omega_p^2 \gamma \omega}{(\omega_0^2 - \omega^2)^2 + \gamma^2 \omega^2}. \end{aligned} \quad (46)$$

Note que um pico de absorção é obtido em  $\chi_e''$  (e, conseqüentemente, na geração de energia térmica) para  $\omega \approx \omega_0$ . Quando a frequência  $f$  do campo elétrico incidente  $\mathbf{E}$  está próxima da frequência de oscilação natural  $\omega_0$  dos elétrons do material, ocorre o fenômeno de ressonância. Um termo relevante nessa descrição semi-clássica é o fator  $\gamma$  que representa a troca de energia entre o elétron e o meio, ou seja a rede cristalina para o caso de um sólido. Isso acontece por uma transferência de energia aos fônons, havendo uma liberação de calor. No modelo quântico o termo é semelhante e a perda por calor está associada a transições não-radiativas.

### 3.6. Imageamento por partículas magnéticas

Como dito acima, NPs magnéticas têm sido utilizadas como agentes de contraste em MRI. No entanto, há importantes limitações nessa aplicação. Primeiro, as NPs não são visualizadas diretamente, mas sim seu efeito na ressonância dos spins dos prótons. Segundo, em muitos casos, os médicos preferem a utilização de agentes de contraste T1. Por fim, em altas concentrações, há distorções na imagem por MRI que comprometem sua aplicação clínica. Ao longo dos anos, cientes dessa limitação, pesquisadores da Philips propuseram uma técnica que efetivamente visualiza as NPs magnéticas, ou seja, detectam traçadores magnéticos [56].

A Imagem por Partículas Magnéticas (MPI – acrônimo para “Magnetic Particle Imaging”) é uma técnica de imageamento inovadora que utiliza as propriedades magnéticas de NPs de óxido de ferro para produzir imagens de alta resolução e em tempo real da distribuição dessas NPs dentro de um sistema biológico [52]. O princípio do MPI é distinto dos métodos como a imagem por ressonância magnética ou raios-X. Em vez de depender das propriedades inerentes do corpo ou da radiação ionizante, o MPI detecta diretamente o sinal emitido pelas NPs de óxido de ferro, que são usadas como traçadoras.

O sistema possui regiões de gradiente de campo magnético, que podem ser obtidas aproximando ímãs permanentes na configuração repulsiva, gerando regiões livres de campo magnético (RLC). Adicionalmente, possui bobinas de excitação e detecção. Os campos magnéticos alternados de excitação promovem respostas magnéticas

de NPs situadas na RLC, mas não perturbam outras NPs nas regiões de alta intensidade de campo pois, nesse caso, os momentos magnéticos já estão saturados na região de alta amplitude de campo magnético. Essas respostas são então detectadas pelas bobinas de detecção, permitindo o mapeamento preciso da distribuição de NPs. O equipamento de MPI permite transladar a posição da RLC. Dessa forma, o sinal das NPs é usado para reconstruir uma imagem que mostra a concentração de NPs, que pode ser correlacionada a detalhes fisiológicos ou patológicos específicos, dependendo da aplicação.

Considerando uma resposta superparamagnética ao campo de excitação, é possível expressar a resolução espacial do MPI como [57]:

$$\Delta x = \frac{24k_B T}{\mu_0 \pi M_S D^3 G} \tag{47}$$

De acordo com essa expressão, a resolução depende do gradiente de campo magnético  $G$  e de propriedades da nanopartícula magnética.

O MPI não detecta nenhum sinal biológico de fundo, pois a única fonte de sinal são as próprias partículas magnéticas. Isso resulta em imagens com contraste muito alto em comparação com outras modalidades de imageamento. Além disso, o MPI pode capturar processos dinâmicos dentro do corpo em tempo real, o que é particularmente útil para aplicações como monitoramento do fluxo vascular ou distribuição de agentes terapêuticos. Ao contrário de técnicas que dependem de radiação ionizante (como tomografia computadorizada – CT, tomografia por emissão de pósitron – PET, etc), o MPI usa um campo magnético seguro e não ionizante, o que é benéfico para imagens repetidas, que podem ser necessárias em diagnósticos clínicos ou monitoramento de tratamento.

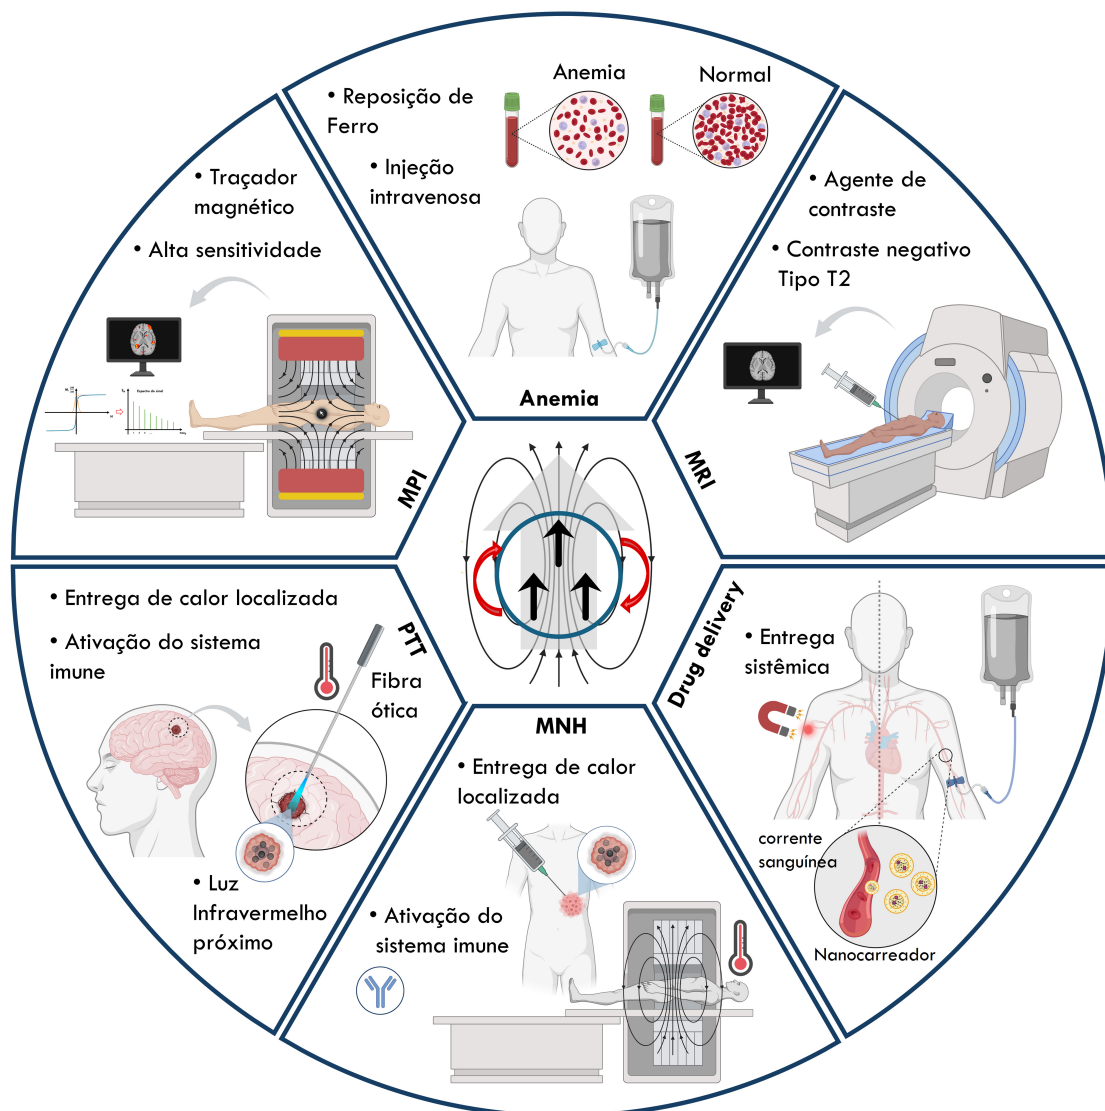

**Figura 5:** Representação esquemática das diversas aplicações das nanopartículas magnéticas à base de óxido de ferro: Anemia, MRI, Entrega de fármacos (“Drug delivery”), Hipertermia magnética (MNH – “Magnetic Nanoparticle Hyperthermia”), PTT e MPI.

No entanto, a técnica requer a injeção de NPs, que devem ser biocompatíveis e projetadas para alvejar tecidos ou células específicas para um imageamento eficaz. E, embora ofereça excelente sensibilidade, a resolução espacial do MPI é geralmente inferior à do MRI de alta resolução, mas o cenário pode modificar bastante com o desenvolvimento de NPs magnéticas com melhores propriedades magnéticas para o MPI [58]. Além disso, essa técnica pode ser utilizada de forma combinada com a hipertermia magnética [59], e tem grande potencial para resolver um importante problema dessa terapia térmica, ou seja, talvez seja capaz de realizar termometria durante o procedimento terapêutico [52].

A Figura (5) apresenta um resumo de diversas aplicações biomédicas de NPs magnéticas à base de óxido de ferro.

#### 4. Considerações Finais

Em suma, os avanços na utilização de NPs magnéticas, especialmente na nanomedicina, demonstram um enorme potencial para desenvolvimento de novas terapias e diagnósticos de doenças, inclusive contra o câncer. A introdução de nanomateriais com propriedades únicas, resultantes dos progressos em física, química, ciência dos materiais, entre outras áreas, oferece novas possibilidades para superar as limitações de terapias convencionais, como a quimioterapia e a radioterapia. Esses nanomateriais, com suas propriedades magnéticas intrínsecas e a capacidade de acoplar à sua superfície diferentes moléculas terapêuticas, estão sendo testados em diversos ensaios clínicos, indicando um futuro promissor para tratamentos mais eficazes e personalizados contra tumores resistentes. Em particular, a combinação de efeitos decorrentes da biodegradação de NPs à base de óxido de ferro com terapias térmicas, sugere grande potencial para imunoterapia [31, 60]. Além disso, o desenvolvimento de uma nova técnica de imagem, MPI, baseada na detecção de NPs magnéticas, pode impactar profundamente o tratamento e diagnóstico de diversas doenças. Espera-se que essas inovações, provenientes da aliança da Física com a Medicina, tragam avanços significativos na terapia do câncer, e outras doenças, beneficiando inúmeros pacientes.

#### Agradecimentos

M.V.-A. agradece o apoio financeiro fornecido pelo Conselho Nacional de Desenvolvimento Científico e Tecnológico – CNPq, grant 380286/2024-6. A.F.B. agradece o apoio financeiro fornecido das agências de fomento: CNPq grants 312458/2021-5 e 405139/2023-3, e a Fundação de Amparo à Pesquisa do Estado de Goiás – FAPEG grant 201710267000511.

#### Referências

- [1] S. Bayda, M. Adeel, T. Tuccinardi, M. Cordani e F. Rizzolio, *Molecules* **25**, 112 (2019).
- [2] G.M. Whitesides, *Small* **1**, 172 (2005).
- [3] E. Boisselier e D. Astruc, *Chemical Society Reviews* **38**, 1759 (2009).
- [4] S.H. Lee e B.H. Jun, *International Journal of Molecular Sciences* **20**, 865 (2019).
- [5] C.T. Matea, T. Mocan, F. Tabaran, T. Pop, O. Mosteanu, C. Puia, C. Iancu e L. Mocan, *International Journal of Nanomedicine* **12**, 5421 (2017).
- [6] M. Manzano e M. Vallet-Regí, *Journal of Materials Science: Materials in Medicine* **29**, 1 (2018).
- [7] S. Marchesan, M. Melchionna e M. Prato, *Fullerenes, Nanotubes and Carbon Nanostructures* **22**, 190 (2014).
- [8] K. Wu, D. Su, J. Liu, R. Saha e J.P. Wang, *Nanotechnology* **30**, 502003 (2019).
- [9] R. Naccache, Q. Yu e J.A. Capobianco, *Advanced Optical Materials* **3**, 482 (2015).
- [10] Z. Hedayatnasab, F. Abnisa e W.M.A.W. Daud, *Materials & Design* **123**, 174 (2017).
- [11] M.E. Aubin-Tam e K. Hamad-Schifferli, *Biomedical Materials* **3**, 034001 (2008).
- [12] B.D. Cullity e C.D. Graham, *Introduction to magnetic materials* (John Wiley & Sons, Hoboken, 2011).
- [13] J.M.D. Coey, *Magnetism and magnetic materials* (Cambridge University Press, Cambridge, 2010).
- [14] H.J. Williams, *Physical Review Journals Archive* **52**, 747 (1937).
- [15] E.C. Stoner e E.P. Wohlfarth, *Philosophical Transactions of the Royal Society of London. Series A, Mathematical and Physical Sciences* **240**, 599 (1948).
- [16] A.P. Guimarães, *Magnetism and Magnetic Resonance in Solids* (John Wiley & Son, Hoboken, 1998).
- [17] R.E. Rosensweig, *Journal of Magnetism and Magnetic Materials* **252**, 370 (2002).
- [18] L. Néel, *Annales de Géophysique* **5**, 99 (1949).
- [19] W.F. Brown Jr, *Physical Review* **130**, 1677 (1963).
- [20] W.T. Coffey e Y.P. Kalmykov, *Journal of Applied Physics* **112**, 124330 (2012).
- [21] M. Bode, O. Pietzsch, A. Kubetzka e R. Wiesendanger, *Physical Review Letters* **92**, 067201 (2004).
- [22] P.S. Stephen, US Patent 3,215,572 (1963).
- [23] R.E. Rosensweig, in: *Advances in Electronics and Electron Physics*, editado por L. Marto (Elsevier, Amsterdã, 1979) v. 48.
- [24] A.F. Bakuzis, L.C. Branquinho, L.L.E. Castro, M.T.D. Amaral e R. Miotto, *Advances in Colloid and Interface Science* **191–192**, 1 (2013).
- [25] H.C. Hamaker, *Physica* **4**, 1058 (1937).
- [26] R.E. Rosenweig, *Ferrohydrodynamics* (Cambridge University Press, Cambridge, 1985).
- [27] M.G. Harisinghani, J. Barentsz, P.F. Hahn, W.M. Derseno, S. Tabatabaei, C. Hulsbergen van de Kaa, J. de la Rosette e R. Weissleder, *The New England Journal of Medicine* **348**, 2491 (2003).
- [28] H.F. Rodrigues, G. Capistrano e A.F. Bakuzis, *International Journal of Hyperthermia* **37**, 76 (2020).

- [29] A.C. Anselmo e S. Mitragotri, *Bioengineering & Translational Medicine* **6**, e10246 (2021).
- [30] F. Soetaert, P. Korangath, D. Serantes, S. Fiering e R. Ivkov, *Advanced Drug Delivery Reviews* **163**, 65 (2020).
- [31] S. Zanganeh, G. Hutter, R. Spitler, O. Lenkov, M. Mahmoudi, A. Shaw, J.S. Pajarinen, H. Nejadnik, S. Goodman, M. Moseley et al., *Nature Nanotechnology* **11**, 986 (2016).
- [32] J.A. Peters, *Progress in Nuclear Magnetic Resonance Spectroscopy* **120-121**, 72 (2020).
- [33] E.R. Cintra, T.G. Hayasaki, A.A. Sousa-Junior, A.C.G. Silva, M.C. Valadares, A.F. Bakuzis, S.A. Mendanha e E.M. Lima, *Frontiers in Pharmacology* **13**, 854430 (2022).
- [34] R.R. Oliveira, M.S. Carrião, M.T. Pacheco, L.C. Branquinho, A.L.R. de Souza, A.F. Bakuzis e E.M. Lima, *Materials Science and Engineering: C* **92**, 547 (2018).
- [35] R.R. Oliveira, E.R. Cintra, A.A. Sousa-Junior, L.C. Moreira, A.C.G. Silva, A.L.R. Souza, M.C. Valadares, M.S. Carrião, A.F. Bakuzis e E.M. Lima, *Pharmaceutics* **15**, 818 (2023).
- [36] J. Klostergaard e C.E. Seeney, *Nanomedicine: Nanotechnology, Biology and Medicine* **8**, S37 (2012).
- [37] M.S. Carrião, K.S. Neto e A.F. Bakuzis, *Journal of Physics D: Applied Physics* **47**, 025003 (2013).
- [38] R.H. Fang, A.V. Kroll, W. Gao e L. Zhang, *Advanced Materials* **30**, 1706759 (2018).
- [39] V. Chugh, K.V. Krishna e A. Pandit, *ACS Nano* **15**, 17080 (2021).
- [40] S. Malhotra, S. Dumoga e N. Singh, *Wiley Interdisciplinary Reviews: Nanomedicine and Nanobiotechnology* **14**, e1776 (2022).
- [41] A.A. Sousa-Junior, S.A. Mendanha, M.S. Carrião, G. Capistrano, A.G. Prospero, G.A. Soares, E.R. Cintra, S.F.O. Santos, N. Zufelato, A. Alonso et al., *Molecular Pharmaceutics* **17**, 837 (2020).
- [42] A.A. Sousa-Junior, F. Mello-Andrade, J.V.R. Rocha, T.G. Hayasaki, J.S. Curcio, L.C. Silva, R.C. Santana, E.M. Lima, C.G. Cardoso, E.P. Silveira-Lacerda et al., *Pharmaceutics* **15**, 943 (2023).
- [43] H.F. Rodrigues, F.M. Mello, L.C. Branquinho, N. Zufelato, E.P. Silveira-Lacerda e A.F. Bakuzis, *International Journal of Hyperthermia* **29**, 752 (2013).
- [44] H.F. Rodrigues, G. Capistrano, F.M. Mello, N. Zufelato, E. Silveira-Lacerda e A.F. Bakuzis, *Physics in Medicine & Biology* **62**, 4062 (2017).
- [45] G. Capistrano, A.A. Sousa-Junior, R.A. Silva, F. Mello-Andrade, E.R. Cintra, S. Santos, A.D. Nunes, R.M. Lima, N. Zufelato, A.S. Oliveira et al., *ACS Biomaterials Science & Engineering* **6**, 4523 (2020).
- [46] D.J. Griffiths, *Eletrodinâmica* (Pearson Universidades, São Paulo, 2010).
- [47] M.S. Carrião, V.R.R. Aquino, G.T. Landi, E.L. Verde, M.H. Sousa e A.F. Bakuzis, *Journal of Applied Physics* **121**, 173901 (2017).
- [48] E.L. Verde, G.T. Landi, M.S. Carrião, A.L. Drummond, J.A. Gomes, E.D. Vieira, M.H. Sousa e A.F. Bakuzis, *AIP Advances* **2**, 032120 (2012).
- [49] R.K. Gilchrist, R. Medal, W.D. Shorey, R.C. Hanselman, J.C. Parrott e C.B. Taylor, *Annals of Surgery* **146**, 596 (1957).
- [50] K. Maier-Hauff, R. Rothe, R. Scholz, U. Gneveckow, P. Wust, B. Thiesen, A. Feussner, A. Deimling, N. Waldoefner, R. Felix et al., *Journal of Neuro-Oncology* **81**, 53 (2007).
- [51] K. Maier-Hauff, F. Ulrich, D. Nestler, H. Niehoff, P. Wust, B. Thiesen, H. Orawa, V. Budach e A. Jordan, *Journal of Neuro-Oncology* **103**, 317 (2011).
- [52] S. Healy, A. F Bakuzis, P.W. Goodwill, A. Attaluri, J.W.M. Bulte e R. Ivkov, *Wiley Interdisciplinary Reviews: Nanomedicine and Nanobiotechnology* **14**, e1779 (2022).
- [53] M. Vinícius-Araujo, N. Shrivastava, A.A. Sousa-Junior, S.A. Mendanha, R.C. Santana e A.F. Bakuzis, *ACS Applied Nano Materials* **4**, 2190 (2021).
- [54] A.R. Rastinehad, H. Anastos, E. Wajswol, J.S. Winoker, J.P. Sfakianos, S.K. Doppalapudi, M.R. Carrick, C.J. Knauer, B. Taouli, S.C. Lewis et al., *Proceedings of the National Academy of Sciences* **116**, 18590 (2019).
- [55] X. Li, J.F. Lovell, J. Yoon e X. Chen, *Nature Reviews Clinical Oncology* **17**, 657 (2020).
- [56] B. Gleich e J. Weizenecker, *Nature* **435**, 1214 (2005).
- [57] P.W. Goodwill, E.U. Saritas, L.R. Croft, T.N. Kim, K.M. Krishnan, D.V. Schaffer e S.M. Conolly, *Advanced materials* **24**, 3870 (2012).
- [58] Z.W. Tay, S. Savliwala, D.W. Hensley, K.L.B. Fung, C. Colson, B.D. Fellows, X. Zhou, Q. Huynh, Y. Lu, B. Zheng et al., *Small Methods* **5**, 2100796 (2021).
- [59] Z.W. Tay, P. Chandrasekharan, A. Chiu-Lam, D.W. Hensley, R. Dhavalikar, X.Y. Zhou, E.Y. Yu, P.W. Goodwill, B. Zheng, C. Rinaldi et al., *ACS Nano* **12**, 3699 (2018).
- [60] Z. Yang, D. Gao, J. Zhao, G. Yang, M. Guo, Y. Wang, X. Ren, J.S. Kim, L. Jin, Z. Tian et al., *Nature Reviews Clinical Oncology* **20**, 116 (2023).
